# Supplementary material for: Berberine Regulation of Cellular Oxidative Stress, Apoptosis and Autophagy by Modulation of m6A mRNA Methylation through Targeting the Camk1db/ERK Pathway in Zebrafish-Hepatocytes
Source: MDPI journal article supplement (doi:10.3390/antiox11122370), 2022-11-30

# ***Supporting Information***

**Title : Berberine Regulation of Cellular Oxidative Stress, Apoptosis and Autophagy by Modulation of m<sup>6</sup>A mRNA Methylation through Targeting the *Camk1db*/ERK Pathway in Zebrafish-Hepatocytes**

**Meijuan Zhang <sup>1</sup>, Jin Liu <sup>1</sup>, Chengbing Yu <sup>1</sup>, Shangshang Tang <sup>1</sup>, Guangzhen Jiang <sup>2</sup>, Jing Zhang <sup>1</sup>, Hongcai Zhang <sup>1</sup>, Jianxiong Xu <sup>1</sup> and Weina Xu <sup>1,\*</sup>**

<sup>1</sup> Shanghai Key Laboratory for Veterinary and Biotechnology, School of Agriculture and Biology, Shanghai Jiao Tong University, No. 800 Jiangchuan Road, Shanghai 200240, China

<sup>2</sup> Key Laboratory of Aquatic Nutrition and Feed Science of Jiangsu Province, College of Animal Science and Technology, Nanjing Agricultural University, No. 1 Weigang Road, Nanjing 210095, China

\* Correspondence: xuweina@sjtu.edu.cn

**The file includes 6 tables, 2 figures.**

**Table S1** Distribution of m6A peaks.

**Table S2** Statistics of the number of differentially methylated genes.

**Table S3** Peaks distribution statistics of differentially methylated genes.

**Table S4** Transcription level change statistics.

**Table S5** Statistics of changes in methylation level and transcription level.

**Table S6** Changes in the methylation level and transcription level of Camk1db gene.

**Figure S1** ROS fluorescence microscope picture. The red arrow is the fluorescence of ROS in zebrafish liver cells. The higher the ROS content, the stronger the fluorescence intensity. Data was presented as mean  $\pm$  SEM (n=3).

**Figure S2** Flow cytometry detection graphs. The cell count in each group is 10,000.

**Table S1**Table S1. Distribution of m<sup>6</sup>A peaks

| Group   | 5'UTR (%) | 3'UTR (%) | 1st Exon (%) | Other Exon (%) |
|---------|-----------|-----------|--------------|----------------|
| Control | 25.12     | 43.3      | 6.43         | 25.16          |
| SP      | 25.55     | 45.6      | 5.88         | 22.97          |
| BBR     | 31.22     | 37.69     | 6.66         | 24.43          |
| SP+BBR  | 31.22     | 36.36     | 7.04         | 25.39          |

**Table S2**

Table S2. Statistics of the number of differentially methylated genes

| Comparison Group | Number of genes upregulated by<br>methylation * | Number of genes down-regulated by<br>methylation * |
|------------------|-------------------------------------------------|----------------------------------------------------|
| SP / Con         | 135                                             | 96                                                 |
| BBR / Con        | 300                                             | 188                                                |
| SP+BBR / Con     | 467                                             | 331                                                |
| BBR / SP         | 243                                             | 250                                                |
| SP+BBR / SP      | 65                                              | 42                                                 |
| SP+BBR / BBR     | 254                                             | 187                                                |

Note: Differential genes were screened by fold-change and p-value of univariate analysis. Screening conditions: 1) fold-change  $\geq 2$ ; 2) p-value  $< 0.05$ , the intersection of the two, and the common genes, namely differential genes, were obtained. \*  $p < 0.05$ ,  $fc \geq 2$ .

**Table S3**

Table S3. Peaks distribution statistics of differentially methylated genes

| Comparison Group | 5'UTR (%) | 3'UTR (%) | 1st Exon (%) | Other Exon (%) |
|------------------|-----------|-----------|--------------|----------------|
| SP / Con         | 25.91     | 46.03     | 6.09         | 21.97          |
| BBR / Con        | 32.37     | 41.46     | 5.91         | 20.26          |
| SP+BBR / Con     | 29.35     | 45.42     | 5.31         | 19.92          |
| BBR / SP         | 27.43     | 48.24     | 5.95         | 18.38          |
| SP+BBR / SP      | 26.39     | 49.77     | 5.06         | 18.79          |
| SP+BBR / BBR     | 33.28     | 37.23     | 6.32         | 23.17          |

**Table S4**

Table S4. Transcription level change statistics

| Comparison Group | Number of transcript expression<br>upregulation * | Number of transcript expression<br>down-regulation * |
|------------------|---------------------------------------------------|------------------------------------------------------|
| SP / Con         | 208                                               | 195                                                  |
| BBR / Con        | 1468                                              | 754                                                  |
| SP+BBR / Con     | 1539                                              | 1037                                                 |
| BBR / SP         | 1220                                              | 654                                                  |
| SP+BBR / SP      | 1258                                              | 789                                                  |
| SP+BBR / BBR     | 254                                               | 413                                                  |

Note: Differential genes were screened by fold-change and p-value of univariate analysis. Screening conditions: 1) fold-change  $\geq 2$ ; 2) p-value  $< 0.05$ , the intersection of the two, and the common genes, namely differential genes, were obtained. \*  $p < 0.05$ ,  $fc \geq 2$ .

**Table S5**

Table S5. Statistics of changes in methylation level and transcription level

| Comparison Group | Number of methylation<br>up/down-regulated | Number of transcripts<br>up/down-regulated | Number of significant<br>common differences |
|------------------|--------------------------------------------|--------------------------------------------|---------------------------------------------|
| SP / Con         | 135 / 96                                   | 176 / 171                                  | 2                                           |
| BBR / Con        | 300 / 188                                  | 1456 / 1387                                | 64                                          |
| SP+BBR / Con     | 467 / 331                                  | 1464 / 983                                 | 100                                         |
| BBR / SP         | 243 / 250                                  | 1135 / 603                                 | 49                                          |
| SP+BBR / SP      | 65 / 42                                    | 1173 / 738                                 | 106                                         |
| SP+BBR / BBR     | 254 / 187                                  | 13 / 50                                    | 6                                           |

**Table S6**

Table S6. Changes in the methylation level and transcription level of Camk1db gene

| Comparison Group | Methylation level | Transcript level |
|------------------|-------------------|------------------|
| SP / Control     | Down *            | Down             |
| BBR / SP         | Up *              | Up *             |
| BBR+SP / SP      | Up *              | Up *             |

Note: Differential genes were screened by fold-change and p-value of univariate analysis. Screening conditions: 1) fold-change  $\geq 2$ ; 2) p-value  $< 0.05$ , the intersection of the two, and the common genes, namely differential genes, were obtained. \*  $p < 0.05$ ,  $fc \geq 2$ .

**Figure S1**

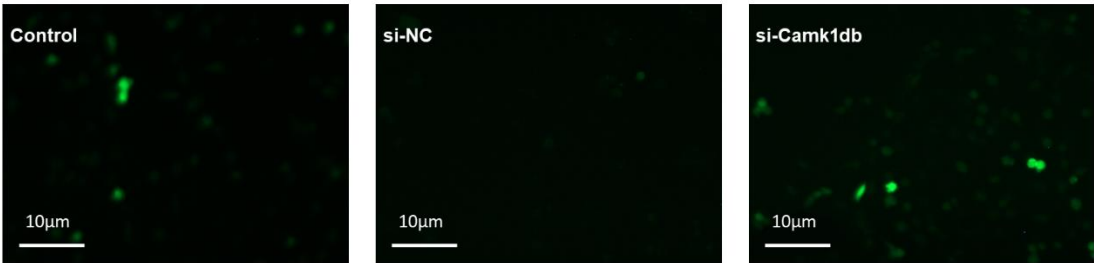

**Figure S2**

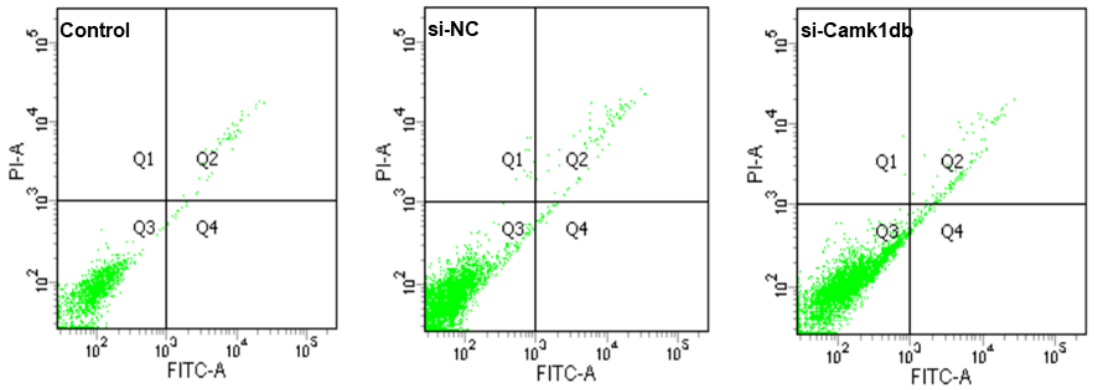

Supplement: s1 [file s1]
